# Supplementary material for: Ever Changing Times: Sustainability Transformations of Galician Small-Scale Fisheries
Source: Frontiers journal article supplement (doi:10.3389/fmars.2021.712819), 2021-08-05
Supplement: Table_1.DOCX [file Table_1.DOCX]

Supplementary Material

# Supplementary Tables

| **Supplementary Table 1.** Summary of publications (scientific papers, PhD thesis, books, book chapters and oral presentations presented at congresses) of Galician SSF between 1990-2020 | | |
| --- | --- | --- |
| **Author/s, Year** | **Title** | **Journal/Institution/Congress** |
| Arnaiz and De Coo, 1990 | Fishing gear in the Ría de Arousa | Xunta de Galicia |
| Simón et al., 1996 | The small-scale squid hand-jig fishery off the northwestern Iberian Peninsula: application of a model based on a short survey of fishery statistics | Fisheries Research 25(3-4), 253-263 |
| Pérez-Sánchez, 1997 | Fishing and its exploitation in Galician geographic research. A critical analysis of fishery statistics. | Espacios Rurais e Sociedades Campesiñas 9, 129-142 |
| Fariña-Catro, 1998 | Fishing gear and tackle used in Galicia | Fondo bibliográfico del CETMAR 1-69 |
| Coppel-Hidalgo, 2000 | Sailors on land and politicians of the sea. Biological resource management versus social management of fishermen. | Revista Disparidades 55(1), 429-438 |
| Freire and Garcia-Allut, 2000 | Socioeconomic and biological causes of management failures in European artisanal fisheries: the case of Galicia (NW Spain) | Marine Policy 24(5), 375-384 |
| Lois-González and Bjorn-Lindkvist, 2000 | Regional aspects of fisheries in Galicia and Norway. | Revista Ería 51, 69-78 |
| Varela and Iglesias, 2000 | Trends and problems of Galician fisheries in the global and community context | Revista Galega de Economía 9(1), 1-27 |
| Fernández, 2002 | The scarcity of fishery and shellfish resources: a critical overview | Revista Zainak 21, 63-74 |
| Freire, 2002 | Sustainable fisheries management | Adega Cadernos 9, 9-27 |

| **Author/s, Year** | **Title** | **Journal/Institution/Congress** |
| --- | --- | --- |
| Garcia-Allut and Freire, 2002 | Fishery Production Processes and Uncertainty: The Commercialization of Fishery Products in Galician Artisanal Fisheries | Andar o mar: II Xornadas Internacionais de Cultura Tradicional |
| García-Allut, 2003a | Artisanal fishing, change and the patrimonialization of knowledge | Revista PH 44, 74-75 |
| García-Allut, 2003b | Galician artisanal fishing and the marketing problem: is lonxanet.com an alternative? | Zainak 25, 17-32 |
| Amigo-Dobaño et al., 2004 | The integration relationships in the distribution chain of small-scale fishing in Galicia | Ocipesca-Interreg III |
| Cabaleiro-Casal et al., 2004 | The Cooperative Societies of the Sea: Impediments to their Implementation in Galicia | Revesco 84, 7-35 |
| Freire, 2004 | The role of scientific research in support of the artisanal fishing sector | Workshop “Pesca artesanal y sostenibilidad en España y Latinoamérica” |
| Piñeiro de San Miguel and Gómez-Blanco, 2004 | Artisanal fishing in Pontedeume in the first two thirds of the 20th century. | Cátedra: Revista eumesa de estudios 11, 2-21 |
| Carballo-Penela et al., 2005 | Structural analysis of the Galician fishing sector: challenges and future prospects in the European Union | Anales de Economía Aplicada |
| Martínez et al., 2005 | Application of thermal and color images to the study of pelagic species off the coast of Galicia | XI Congreso Nacional de Teledetección |
| Moreno et al., 2005 | Preliminary assessment of the impacts of climate change in Spain | Ministerio de Medio Ambiente (España) |
| Otero-Villar et al., 2005 | Modelling artisanal coastal fisheries of Galicia (NW Spain) based on data obtained from fishers: the case of Octopus vulgaris | Scientia Marina 69(4), 577-585 |
| Rocha and Mantilla, 2005 | Octopus farming, an alternative for the future? | Europa Azul 90, 50-51 |

| **Author/s, Year** | **Title** | **Journal/Institution/Congress** |
| --- | --- | --- |
| Fernández-Macho et a., 2006 | Measuring economic impacts from a social accounting matrix: the Galician fishing sector | Revista Española de Descubrimientos Agrosociales y Pesqueros 212, 1-39 |
| García-Allut, 2006 | The confraternities, commercialization and the paradigm shift |  |
| Otero-Villar, 2006 | Ecology of the common octopus (*Octopus vulgaris* Cuvier, 1797) in a coastal upwelling area (Galicia, NE Atlantic) | PhD Thesis. University of Vigo |
| Rocha et al., 2006 | Modelling small-scale coastal fisheries of Galicia (NW Spain) based on data obtained from fisheries: the case of Sepia officinalis | Scientia Marina 70, 593-601 |
| Corgos et al., 2007 | Assessment of methods to estimate abundance and population structure of the spider crab *Maja brachydactyla* in soft substrates | Fisheries Research 83, 297-305 |
| Bañón et al., 2008 | Composition, distribution and abundance of rays (Elasmobranchii: Rajidae) in Galician coastal waters | Foro dos Recursos mariños e de acuicultura das rías galegas |
| Fernández-Vidal, 2008 | Artisanal fishing, culture and heritage: "the traditional knowledge of Galician fishermen" | Adra 3, 67-79 |
| Guerra et al., 2008 | Human impact on the ecosystem of the Vigo estuary: towards an integrated management | Instituto de Estudios Vigueses |
| Labarta et al., 2008 | Biological and economic yields of artisanal fishing and shellfishing in Galicia. Productivity and/or commercialization in management strategies | Fundación CaixaGalicia. CIEF. Centro Investigación Económica y Financiera |
| Otero et al., 2008 | Bottom-up control of common octopus *Octopus vulgaris* in the Galician upwelling system, northeast Atlantic Ocean | Marine Ecology Progress Series 362, 181-192 |
| Amigo-Dobaño et al., 2009 | Price transmission in the commercial chain of Galician coastal fisheries. The case of octopus | Revista Española de Descubrimientos Agrosociales y Pesqueros 222, 49-72 |
| Bode et al., 2009 | Impact of climate change on oceanographic conditions and marine resources | Evidencias e impactos do cambio climático en Galicia 31, 619-635 |
| Carballo-Penela and Villasante, 2009 | Fisheries management and sustainable management of the Galician coastline | Fundación Pedro Barrié de La Maza |
| **Author/s, Year** | **Title** | **Journal/Institution/Congress** |
| Lafuente-Varela and Garza-Gil, 2009 | Economic-institutional coordinates for an integrated management of the sea. The case of Galicia | Revista Española de Estudios Agrosociales y Pesqueros 223, 49-75 |
| Ríal-García, 2009 | Women's work and subsistence economy: the example of modern Galicia | Manuscrits: revista d' història moderna 27, 77-99 |
| Villasante, 2009 | Magnitude and implications of the community fisheries policy | PhD Thesis. University of Santiago de Compostela |
| Cervera-Paz, 2010 | Cooperative perception of fishermen's associations: an empirical study | Revesco 103, 7-32 |
| García-Allut and Seijo-Villamizar, 2010 | Deliberation and cultural integration in artisanal fishing communities: the case of RECOPADES (Network of Artisanal Fishing Communities for Sustainable Development) | XIV Encuentro de latinoamericanistas Españoles |
| Corgos et al., 2011 | Spatial structure of the spider crab, *Maja brachydactyla* population: Evidence of metapopulation structure | Journal of Sea Research 66, 9-19 |
| Fernández-Boán et al., 2012 | History and management strategies of the sea urchin *Paracentrotus lividus* fishery in Galicia (NW Spain) | Ocean and Coastal Management 69, 265-272 |
| García-Allut and Vázquez-Portela, 2012 | New governance of coastal ecosystems: a methodological proposal | I Congreso Iberoamericano de Gestión Integrada de Áreas Litorales |
| García-Seoane, 2012 | The Galician hake fishery: analysis of its present and future using FLR | MSc Thesis. University of Barcelona |
| Lois-González and Piñeiro-Antelo, 2012 | Sustainable Coastal Communities. A case study in Galicia | Agali Journal 2, 51-58 |
| Pereira, 2012 | Fishing capitalism and trade unionism in pre-war Spain: the national federation of the fishing industry | Revista Andaluza de Antropología 4, 122-146 |
| Fernández-Boán et al., 2013 | Monitoring the fishing process in the sea urchin diving fishery of Galicia | ICES Journal of Marine Science 70(3), 604-617 |

| **Author/s, Year** | **Title** | **Journal/Institution/Congress** |
| --- | --- | --- |
| Macho et al., 2013 | The Key Role of the Barefoot Fisheries Advisors in the Co-managed TURF System of Galicia (NW Spain) | AMBIO 42, 1057-1069 |
| Villegas Ríos, 2013 | Life-history and behaviour of *Labrus bergylta* in Galicia | PhD Thesis. University of Vigo |
| Burgós and Fernández 2014 | Marine Protected Areas Spanish context and the case of Os Miñarzos | Letras Verdes 15, 30-54 |
| Alonso-Fernández et al., 2015 | Catch rate Standardization of finfishes targeted by the Galician (NE Atlantic) Small-Scale fishery | Final Report ICES Science Fund |
| García-Soto, 2015 | Evaluation of advanced methodologies for the conservation of marine species caught by the Galician fleet in community fishing grounds | PhD Thesis. University of Santiago de Compostela |
| Tubío, 2015 | Marine reserve of fishing interest Ría de Cedeira (Galicia, NW Spain): ecological and fishing characterization | PhD Thesis. University of A Coruña |
| Castro-Ríal, 2015 | Ecosystem Approach and Socioeconomic Impact Assessment of fisheries in Galicia | PhD Thesis. University of Vigo |
| Pita et al., 2016 | The use of the traditional ecological knowledge of fishermen, cost-effective tools and participatory models in artisanal fisheries: Towards the co-management of common octopus in Galicia (NW Spain) | Fisheries Research 178, 4-12 |
| Villasante et al., 2016 | Fishers' perceptions about the EU discards policy and its economic impact on small-scale fisheries in Galicia (North West Spain) | Ecological Economics 130, 130-138 |
| Fernández-Vidal, 2017 | Application of bottom-up decision making models in small-scale artisanal fishery production systems | PhD Thesis. University of A Coruña |
| Bañón et al., 2018 | The traditional small-scale octopus trap fishery off the Galician coast (Northeastern Atlantic): Historical notes and current fishery dynamics | Fisheries Research 206, 115-128 |

| **Author/s, Year** | **Title** | **Journal/Institution/Congress** |
| --- | --- | --- |
| Fernández -Gestido and Iglesias-Pastoriza, 2018 | Analysis of shellfish gatherings in Galicia (Spain) based on Elinor Östrom's theory of the government of the commons | XVIII Encuentro Internacional AECA |
| Garza-Gil et al., 2018 | The Galician artisanal fishing sector guilds: challenges and opportunities | Working Paper 18/03 |
| Outeiro et al., 2018 | Estimating fishers' net income in small-scale fisheries: Minimum wage or average wage? | Ocean and Coastal Management 165, 307-318 |
| Piñeiro-Antelo et al., 2018 | Peruvian immigration and fishing in the port of Cambados (Galicia): a gender perspective | Boletín de la Asociación de Geógrafos Españoles 76, 218-246 |
| Villasante et al., 2018 | Report on the impact of the European Union landing obligation on small-scale fishing in Galicia | Ocean Coast 170, 60-71 |
| García et al., 2019 | Fishermen's associations of the small-scale fisheries: Study applied to the participation in the *Cofradías* of Galicia (NW Spain) | Ocean and Coastal Management 178, 104841 |
| Garcia-Lorenzo et al., 2019 | Adaptative processes in small-scale traditional fishermen´s organizations. The case of *Cofradías* in Galicia (NW Spain) | Marine Policy 99, 382-390 |
| Villasante et al., 2019 | Socio-economic impacts of the landing obligation of the European Union Common Fisheries Policy on Galician (NW Spain) small-scale fisheries | Ocean and Coastal Management 170, 60-71 |
| Casal et al., 2020 | Spatial structure and abundance of the sea urchin *Paracentrotus lividus* in subtidal fishing grounds of the Galician coast (NW- Spain) | Estuarine, Coastal and Shelf Science 239, 1-10 |
| García, 2020 | Governance and participation in small-scale fisheries. The case of the Galician fishermen's associations | PhD Thesis. University of Vigo |
| Garza-Gil, 2020 | Governance in small-scale fisheries of Galicia (NW Spain): Moving toward co-management? | Ocean and Coastal Management 184, 1-7 |
| Outeiro et al., 2020 | Influence of aquaculture on fishing strategies: Insights from Galician small-scale fisheries | Aquaculture 521, 1-11 |

| **Author/s, Year** | **Title** | **Journal/Institution/Congress** |
| --- | --- | --- |
| Ruiz-Díaz et al., 2020 | Social-ecological vulnerability to climate change in small-scale fisheries managed under spatial property rights systems | Marine Policy 121, 1-13 |
| Vidal et al., 2020 | Understanding Fishermen-Scientist Collaboration in Galician Small-Scale Fisheries (NW Spain): Validating a Methodological Toolbox Through a Process-Oriented Approach | Collaborative Research in Fisheries (pp. 61-84) |
